# Supplementary material
Source: publisher site journal article supplement (https://www.dovepress.com/article/414638)
Supplement: Supplementary file 1 [file get_supplementary_file.php]

**Supplementary table 1 Demographic and clinical characteristics of the study cohort**

| **Variable** | **Assessment complete**  **(n=140)** | **Assessment incomplete (n=39)** | **χ2/Z** | ***P*** |
| --- | --- | --- | --- | --- |
| Gender |  |  |  |  |
| Male | 113(80.71%) | 28(71.79%) | 1.45 | 0.23a |
| Female | 27(19.29%) | 11(28.21%) |  |  |
| Age, median (QR), y | 43(32,51) | 43(31,55) | 0.23 | 0.82b |
| Education |  |  |  |  |
| Low | 83(59.29%) | 17(43.59%) | 3.25 | 0.20a |
| Medium | 36(25.71%) | 15(38.46%) |  |  |
| High | 21(15.00%) | 7(17.95%) |  |  |
| Career |  |  |  |  |
| Manual | 88(62.86%) | 21(53.85%) | 1.87 | 0.30a |
| Intellectual | 12(8.57%) | 6(15.38%) |  |  |
| Other | 40(28.57%) | 12(30.77%) |  |  |
| Cause of injury |  |  |  |  |
| Heavy pound | 27(19.29%) | 5(12.82%) | 4.30 | 0.23a |
| Traffic accidents | 26(18.57%) | 10(25.64%) |  |  |
| Fall | 53(38.57%) | 10(25.64%) |  |  |
| Other | 34(23.57%) | 14(35.90%) |  |  |
| Injury level |  |  |  |  |
| Cervical | 44(30.71%) | 12(30.77%) | 3.92 | 0.10a |
| Thoracic | 66(48.57%) | 13(33.33%) |  |  |
| Lumbar-sacral | 30(20.71%) | 14(35.90%) |  |  |
| Injury severity |  |  |  |  |
| Complete | 80(52.86%) | 16(35.90%) | 5.52 | 0.07a |
| Incomplete | 60(47.14%) | 23(64.10%) |  |  |
| Duration of SCI, m |  |  |  |  |
| ≤1 | 77(55.00%) | 15(38.46%) | 3.99 | 0.26c |
| 1-3 | 32(23.57%) | 11(28.21%) |  |  |
| 3-6 | 10(7.14%) | 3(7.69%) |  |  |
| >6 | 21(14.29%) | 10(25.64%) |  |  |

**Notes:** Continuous variables are presented as median and quartile range (QR, not normally distributed). Categorical variables are presented as counts and percentages. a Chi-square test; b Mann-Whitney U test; c Fisher's exact test

**Abbreviations:** QR, quartile range; y, year; SCI, spinal cord injury; m, month.

**Supplementary table 2 Multivariate linear regression predicting mean relative function gain of Spinal Cord Independence Measure-selfcare**

| **Predictor (Reference)** | | **Unstandardized β(95%CI), %** | ***P*** |
| --- | --- | --- | --- |
| NP (No) | Yes | 11.17(2.65,19.68) | **<0.01** |
| Injury severity (Complete) | Incomplete | 15.13(6.12,24.13) | **0.01** |
| Injury level (Cervical) | Thoracic | 9.31(-0.71,19.33) | 0.07 |
|  | Lumbar-sacral | 14.61(2.56,26.65) | **0.02** |

**Notes:** Bold font indicates statistical significance (*P*<0.05).

**Abbreviations:** mRFG, mean relative function gain; SCIM, Spinal Cord Independence Measure; CI, confidence interval; NP, neuropathic pain.

**Supplementary table 3 Multivariate linear regression predicting** **mean relative function gain of Spinal Cord Independence Measure-respiration and sphincter**

| **Predictor (Reference)** | | **Unstandardized β(95%CI), %** | ***P*** |
| --- | --- | --- | --- |
| NP (No) | Yes | 20.60(10.69,30.51) | **<0.01** |
| Injury severity (Complete) | Incomplete | 26.29(15.82,36.77) | **<0.01** |
| Injury level (Cervical) | Thoracic | 1.38(-10.28,13.03) | 0.82 |
|  | Lumbar-sacral | 8.93(-5.08,22.94) | 0.21 |

**Notes:** Bold font indicates statistical significance (*P*<0.05).

**Abbreviations:** mRFG, mean relative function gain; SCIM, Spinal Cord Independence Measure; CI, confidence interval; NP, neuropathic pain.

**Supplementary table 4 Multivariate linear regression predicting mean relative function gain of Spinal Cord Independence Measure-mobility**

| **Predictor (Reference)** | | **Unstandardized β(95%CI), %** | ***P*** |
| --- | --- | --- | --- |
| NP (No) | Yes | 9.06(0.71,17.40) | **0.03** |
| Injury severity (Complete) | Incomplete | 14.14(5.28, 23.00) | **<0.01** |
| Injury level (Cervical) | Thoracic | 1.49(-8.29, 11.26) | 0.76 |
|  | Lumbar-sacral | 5.69(-6.20,17.57) | 0.35 |

**Notes:** Bold font indicates statistical significance (*P*<0.05).

**Abbreviations:** mRFG, mean relative function gain; SCIM, Spinal Cord Independence Measure; CI, confidence interval; NP, neuropathic pain.

**Supplementary table 5 Comparison of mean relative function gain on** **Spinal Cord Independence Measure and its sub-scales between neuropathic pain subgroups**

| **mRFG- SCIM** | **At level pain**  **(n=15), %** | **Below level pain**  **(n=23), %** | **Both**  **(n=30), %** | **Z** | ***P*** |
| --- | --- | --- | --- | --- | --- |
| Total score | 54.93(15.48,61.19) | 39.53(19.15,53,68) | 45.00(14.61,58.51) | 2.01 | 0.37 |
| Selfcare | 50.00(18.75,72.22) | 36.84(10.00,50.00) | 37.50(13.38,55.49) | 2.08 | 0.35 |
| Respiration and sphincter | 70.59(13.33,88.24) | 30.00(11.76,83.33) | 55.88(4.44,82.50) | 0.54 | 0.76 |
| Mobility | 29.17(5.00,45.00) | 25.00(15.00,36.84) | 32.00(16.15,52.03) | 2.07 | 0.35 |

**Notes:** Continuous variables are presented as median and quartile range (QR, not normally distributed).

**Abbreviations:** mRFG, mean relative function gain; SCIM, Spinal Cord Independence Measure; NP, neuropathic pain.

**Supplementary table 6** **Comparison of Spinal Cord Independence Measure and its sub-scales between neuropathic pain subgroups on admission and discharge**

| **SCIM items** | **At level pain**  **(n=15)** | **Below level pain**  **(n=23)** | **Both**  **(n=30)** | **Z** | ***P*** |
| --- | --- | --- | --- | --- | --- |
|
| Total score |  |  |  |  |  |
| Admission | 13.5(9.25,30) | 14(10,29) | 22(10,47) | 0.19 | 0.91 |
| Discharge | 63(32,80) | 50(30,70) | 63(28.5,75.5) | 0.93 | 0.63 |
| Selfcare |  |  |  |  |  |
| Admission | 3(1,5) | 4(1,12) | 4(1,7.5) | 1.86 | 0.39 |
| Discharge | 13(7,17) | 11(8,14) | 12(6,15) | 0.71 | 0.70 |
| Respiration and sphincter |  |  |  |  |  |
| Admission | 10(9,12) | 10(6,25) | 10(6,16) | 0.38 | 0.83 |
| Discharge | 32(15,37) | 29(14,36) | 30(10,37) | 0.51 | 0.78 |
| Mobility |  |  |  |  |  |
| Admission | 2(0,14) | 0(0,12) | 2(0,4) | 0.69 | 0.71 |
| Discharge | 18(10,29) | 12(7,19) | 14(10,22.5) | 2.17 | 0.39 |

**Notes:** Continuous variables are presented as median and quartile range (QR, not normally distributed).

**Abbreviations:** SCIM, Spinal Cord Independence Measure; NP, neuropathic pain.
